# Supplementary material for: Rational engineering yolk–shell In2S3@void@carbon hybrid as polysulfide-absorbable sulfur host for high-performance lithium–sulfur batteries
Source: Royal Society of Chemistry journal article supplement (doi:10.1039/d3dt01300f), 2023-01-01
Supplement: d3dt01300f1.pdf [file d3dt01300f1.pdf]

## Supporting Information

### Rational engineering yolk-shell $\text{In}_2\text{S}_3$ @void@carbon hybrid as polysulfides-absorbable sulfur host for high-performance lithium-sulfur batteries

Yingyi Ding<sup>a</sup>, Zihan Shen<sup>b</sup>, Tianli Han<sup>a</sup>, Jing Xu<sup>a</sup>, Huigang Zhang<sup>c,d</sup>, Chaoquan Hu<sup>\*,c,d</sup> and Jinyun Liu<sup>\*,a</sup>

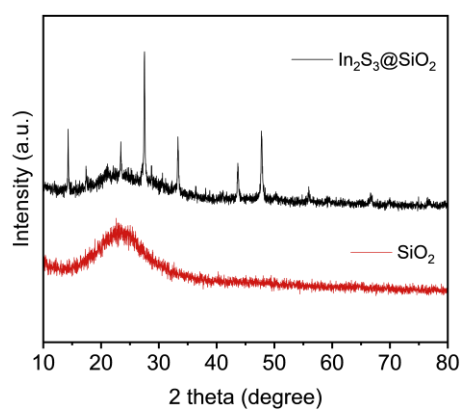

**Figure S1.** XRD patterns of  $\text{SiO}_2$  and  $\text{In}_2\text{S}_3$ @ $\text{SiO}_2$ .

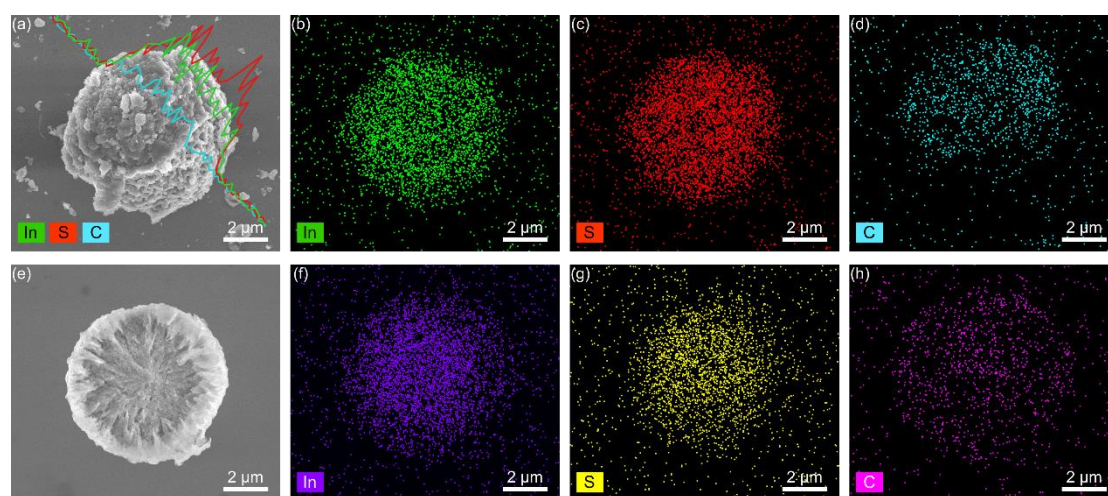

**Figure S2.** (a) Line-scanning curves and (b-d) elemental mapping images of the  $\text{In}_2\text{S}_3$ @S@C hybrids. (e-h) Cross-sectional view and elemental mapping images.

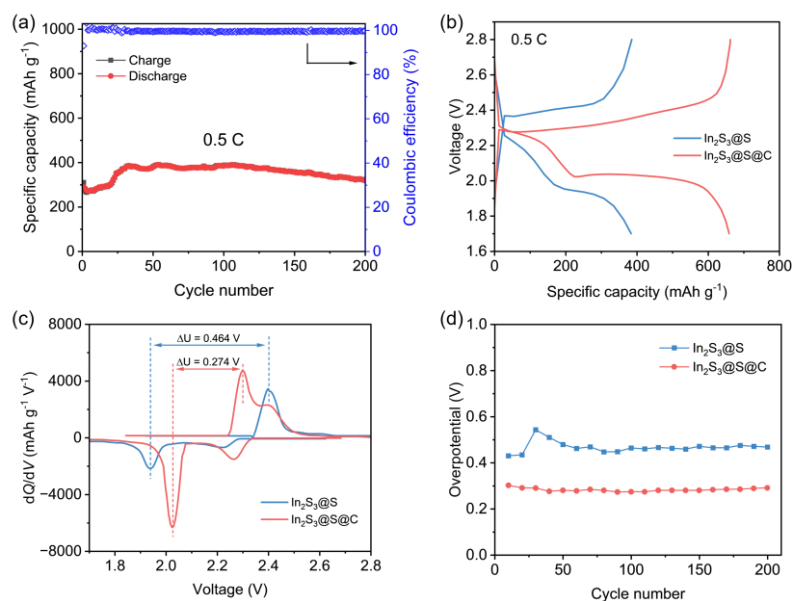

**Figure S3.** (a) Capacities and Coulombic efficiency of the  $\text{In}_2\text{S}_3@\text{S}$  at 0.5 C. (b) Charge-discharge curves of the  $\text{In}_2\text{S}_3@\text{S}$  and  $\text{In}_2\text{S}_3@\text{S}@C$  at 0.5 C. (c) Corresponding  $dQ/dV$  plots. (d) Overpotential of  $\text{In}_2\text{S}_3@\text{S}$  and  $\text{In}_2\text{S}_3@\text{S}@C$  at 0.5 C.

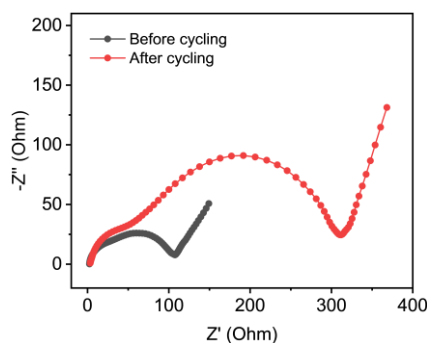

**Figure S4.** EIS spectra of  $\text{In}_2\text{S}_3@\text{S}@C$  before and after cycling 500 times at 0.5 C.

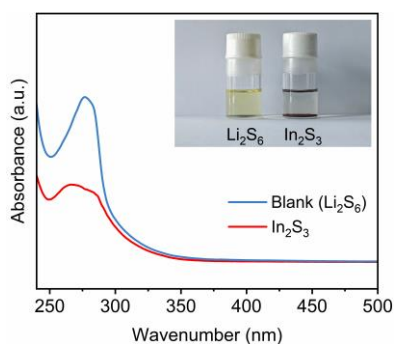

**Figure S5.** The absorbance profiles of the  $\text{Li}_2\text{S}_6$  solutions before and after adding  $\text{In}_2\text{S}_3$  as the absorbent. The inset shows the picture after absorption. For adsorption tests, 60  $\mu\text{L}$  of 0.2 mol L<sup>-1</sup> of  $\text{Li}_2\text{S}_6$  solution was mixed with 3 mL of tetrahydrofuran and 20 mg of samples in a glass vial, keeping for 18 h.
